# Supplementary material for: Interactions of fertilisation and crop productivity on soil nitrogen cycle microbiome and gas emissions
Source: Copernicus journal article supplement (doi:10.5194/egusphere-2024-593), 2024-03-26
Supplement: Supplementary file 1 [file egusphere-2024-593-supplement.pdf]

# Interactions of fertilisation and crop productivity on soil nitrogen cycle microbiome and gas emissions

Laura Kuusemets<sup>1\*</sup>, Ülo Mander<sup>1</sup>, Jordi Escuer-Gatius<sup>2</sup>, Alar Astover<sup>2</sup>, Karin Kauer<sup>2</sup>, Kaido Soosaar<sup>1</sup>, Mikk Espenberg<sup>1</sup>

5

<sup>1</sup>University of Tartu, Institute of Ecology and Earth Sciences, Vanemuise 46, Tartu, 51003, Estonia

<sup>2</sup>Estonian University of Life Sciences, Institute of Agricultural and Environmental Sciences, Kreutzwaldi 5, Tartu, 51014, Estonia

10 *Correspondence to:* Laura Kuusemets (laura.kuusemets@ut.ee)

## Supplementary Materials

15

20

25

30

**Table S1:** Field activities and their timings in the field.

| Field operation       | Date                   | Wheat                                                                                    | Barley                  | Sorghum                                                                                                                                                              |
|-----------------------|------------------------|------------------------------------------------------------------------------------------|-------------------------|----------------------------------------------------------------------------------------------------------------------------------------------------------------------|
| Sowing date           |                        | May 6 <sup>th</sup>                                                                      |                         | May 18 <sup>th</sup>                                                                                                                                                 |
| Organic fertilisation | April 28 <sup>th</sup> |                                                                                          |                         | <i>N0 – 40 t/ha of (231.2 kg N ha<sup>-1</sup>)</i><br><i>N80 – 40 t/ha of (231.2 kg N ha<sup>-1</sup>)</i><br><i>N160 – 40 t/ha of (231.2 kg N ha<sup>-1</sup>)</i> |
| Mineral fertilisation | May 5 <sup>th</sup>    | N80 – 80 kg N ha <sup>-1</sup><br>N160 – 120 kg N ha <sup>-1</sup> N                     |                         |                                                                                                                                                                      |
|                       | May 6 <sup>th</sup>    |                                                                                          |                         | N80 – 80 kg N ha <sup>-1</sup><br>N160 – 160 kg N ha <sup>-1</sup>                                                                                                   |
|                       | June 10 <sup>th</sup>  | N160 – 40 kg N ha <sup>-1</sup>                                                          |                         |                                                                                                                                                                      |
| Herbicide application | June 7 <sup>th</sup>   | Sekator OD: 0.1 l/ha                                                                     |                         |                                                                                                                                                                      |
|                       | June 17 <sup>th</sup>  | Tomahawk 200 EC: 0.35 l/ha<br>MCPA: 1.5 l/ha<br>Orius 250 EW: 1 l/ha<br>Cerone: 0.5 l/ha |                         | Tomahawk 200 EC: 0.35 l/ha<br>MCPA: 1.5 l/ha                                                                                                                         |
| Harvest date          |                        | August 18 <sup>th</sup>                                                                  | August 16 <sup>th</sup> | September 27 <sup>th</sup>                                                                                                                                           |

**Table S2:** Primers used in qPCR, their concentrations and qPCR programs.

| Marker gene           | Primer        | Primer concentration ( $\mu\text{M}$ ) | Reference                        | qPCR program                                                                       |
|-----------------------|---------------|----------------------------------------|----------------------------------|------------------------------------------------------------------------------------|
| bacterial 16S rRNA    | Bact517F      | 0,6                                    | Liu <i>et al.</i> , 2007         | 95°C 10 min; 35 cycles: 95°C 30 s,<br>60°C 45 s; 72°C 45 s                         |
|                       | Bact1028R     |                                        | Dethlefsen <i>et al.</i> , 2008  |                                                                                    |
| archaeal 16S rRNA     | Arc519F       | 0,6                                    | Espenberg <i>et al.</i> , 2016   | 95°C 10 min; 45 cycles: 95°C 15 s,<br>56°C 30 s; 72°C 30 s                         |
|                       | Arch910R      |                                        |                                  |                                                                                    |
| <i>nirK</i>           | nirK876       | 0,8                                    | Hallin ja Lindgren, 1999         | 95°C 10 min; 45 cycles: 95°C 15 s,<br>58°C 30 s; 72°C 30s, 80°C 30 s <sup>a</sup>  |
|                       | nirK1040      |                                        |                                  |                                                                                    |
| <i>nirS</i>           | nirSCd3af     | 0,8                                    | Kandeler <i>et al.</i> , 2006    | 95°C 10 min; 45 cycles: 95°C 15 s,<br>55°C 30 s; 72°C 30s, 80°C 30 s <sup>a</sup>  |
|                       | nirSR3cd      |                                        |                                  |                                                                                    |
| <i>nosZI</i>          | nosZ2F        | 0,8                                    | Henry <i>et al.</i> , 2006       | 95°C 10 min; 45 cycles: 95°C 15 s,<br>60°C 30 s, 72°C 30 s, 80°C 30 s <sup>a</sup> |
|                       | nosZ2R        |                                        |                                  |                                                                                    |
| <i>nosZII</i>         | nosZIIF       | 1.2                                    | Jones <i>et al.</i> , 2013       | 95°C 10 min; 45 cycles: 95°C 30 s,<br>54°C 45 s, 72°C 45 s, 80°C 45 s <sup>a</sup> |
|                       | nosZIIR       |                                        |                                  |                                                                                    |
| bacterial <i>amoA</i> | amoA-1F       | 0,8                                    | Rotthauwe <i>et al.</i> , 1997   | 95°C 10 min; 45 cycles: 95°C 30 s,<br>57°C 45 s, 72°C 45 s                         |
|                       | amoA-2R       |                                        |                                  |                                                                                    |
| archaeal <i>amoA</i>  | CrenamoA 23F  | 0.8                                    | Tourna <i>et al.</i> , 2008      | 95°C 10 min; 45 cycles: 95°C 30 s,<br>55°C 45 s, 72°C 45 s                         |
|                       | CrenamoA 616R |                                        |                                  |                                                                                    |
| comammox <i>amoA</i>  | comamoA AF    | 1.2                                    | Wang <i>et al.</i> , 2018        | 95 °C 10 min; 40 cycles: 95 °C 15 s,<br>55 °C 30 s, 72 °C 30 s                     |
|                       | comamoA SR    |                                        |                                  |                                                                                    |
| <i>nrfA</i>           | nrfAF2awMOD   | 1.2                                    | Cannhenryon <i>et al.</i> , 2019 | 95 °C 10 min; 45 cycles: 95 °C 15 s,<br>56 °C 30 s, 72 °C 30 s                     |
|                       | nrfAR1MOD     |                                        |                                  |                                                                                    |

**Table S3:** Partial N budget of the sites (kg N ha<sup>-1</sup>).

|                                          | Barley         |                |                | Sorghum        |                |                | Sorghum with manure |                |                | Wheat          |                |                |
|------------------------------------------|----------------|----------------|----------------|----------------|----------------|----------------|---------------------|----------------|----------------|----------------|----------------|----------------|
|                                          | N0             | N80            | N160           | N0             | N80            | N160           | N0                  | N80            | N160           | N0             | N80            | N160           |
| N added with manure + mineral fertilizer | 0              | 80             | 160            | 0              | 80             | 160            | 231.2               | 311.2          | 391.2          | 0              | 80             | 160            |
| N in plant biomass                       | 18.17          | 46.06          | 90.14          | 11.63          | 21.02          | 51.73          | 44.82               | 60.48          | 106.34         | 26.39          | 93.56          | 128.74         |
| Change of soil N content                 | -50.09         | -40.38         | 104.40         | -18.41         | -64.38         | -222.79        | -163.11             | -159.34        | -198.82        | -116.62        | -273.28        | -214.64        |
| N losses (Methodology S4)                | 31.93          | 74.31          | -34.54         | 6.78           | 123.36         | 331.06         | 349.49              | 410.06         | 483.68         | 90.24          | 259.72         | 245.89         |
|                                          |                |                |                |                |                |                |                     |                |                |                |                |                |
| N <sub>2</sub> O-N emissions             | 0.08 ±<br>0.02 | 0.16 ±<br>0.02 | 0.31 ±<br>0.03 | 0.09 ±<br>0.04 | 0.09 ±<br>0.03 | 0.34 ±<br>0.03 | 0.18 ±<br>0.04      | 0.34 ±<br>0.06 | 0.32 ±<br>0.02 | 0.10 ±<br>0.01 | 0.22 ±<br>0.04 | 0.45 ±<br>0.06 |
| N <sub>2</sub> -N emissions              | 1.59 ±<br>0.14 | 2.29 ±<br>0.33 | 7.12 ±<br>0.78 | 3.38 ±<br>0.87 | 2.52 ±<br>0.49 | 6.66 ±<br>2.11 | 3.93 ±<br>0.51      | 4.59 ±<br>0.80 | 4.47 ±<br>0.50 | 1.81 ±<br>0.48 | 2.64 ±<br>0.53 | 7.69 ±<br>2.58 |

**Table S4:** Spearman correlation coefficients between soil total carbon, total nitrogen,  $\text{NH}_4^+\text{-N}$ ,  $\text{NO}_3^-\text{-N}$ , total dry weight biomass and N in total dry weight biomass. Significance is indicated as \*\*\* – 0.001; \*\* – 0.01; \* – 0.05; ns – not significant.

|                          | Total carbon | Total nitrogen | $\text{NO}_3^-\text{-N}$ | $\text{NH}_4^+\text{-N}$ | Total biomass | N in total biomass |
|--------------------------|--------------|----------------|--------------------------|--------------------------|---------------|--------------------|
| Total carbon             | 1            | 0.91***        | ns                       | ns                       | 0.49*         | 0.35*              |
| Total nitrogen           | 0.91***      | 1              | 0.50*                    | ns                       | 0.59**        | 0.58**             |
| $\text{NO}_3^-\text{-N}$ | ns           | 0.50*          | 1                        | ns                       | 0.78***       | 0.84***            |
| $\text{NH}_4^+\text{-N}$ | ns           | ns             | ns                       | 1                        | ns            | ns                 |
| Total biomass            | 0.49*        | 0.59**         | 0.78***                  | ns                       | 1             | 0.83***            |
| N in total biomass       | 0.35*        | 0.58**         | 0.84***                  | ns                       | 0.83***       | 1                  |

**Table S5:** Spearman correlation coefficients between gene copies abundance and  $\text{N}_2\text{O}$ -N emissions. Significance is indicated as \*\*\* – 0.001; \*\* – 0.01; \* – 0.05; ns – not significant.

| Gene parameter        | $\text{N}_2\text{O}$ |         |         |                     |         |
|-----------------------|----------------------|---------|---------|---------------------|---------|
|                       | All                  | Barley  | Sorghum | Sorghum with manure | Wheat   |
| bacterial 16S rRNA    | ns                   | ns      | ns      | ns                  | ns      |
| archaeal 16S rRNA     | 0.18*                | ns      | ns      | ns                  | ns      |
| <i>nirK</i>           | ns                   | ns      | ns      | ns                  | ns      |
| <i>nirS</i>           | 0.19*                | 0.58*** | ns      | ns                  | ns      |
| <i>nosZI</i>          | ns                   | ns      | ns      | ns                  | ns      |
| <i>nosZII</i>         | ns                   | ns      | ns      | 0.41*               | -0.46** |
| bacterial <i>amoA</i> | ns                   | ns      | ns      | ns                  | -0.40*  |
| archaeal <i>amoA</i>  | -0.15*               | ns      | ns      | ns                  | ns      |
| comammox <i>amoA</i>  | ns                   | ns      | -0.47** | ns                  | ns      |
| <i>nrfA</i>           | ns                   | ns      | ns      | ns                  | ns      |

45 **Table S6:** Spearman correlation coefficients between moisture and gene copies abundance and N<sub>2</sub>O-N emissions. Significance is indicated as \*\*\* – 0.001; \*\* – 0.01; \* – 0.05; ns – not significant.

| Gene parameter/N <sub>2</sub> O-N | Moisture |         |         |                     |       |
|-----------------------------------|----------|---------|---------|---------------------|-------|
|                                   | All      | Barley  | Sorghum | Sorghum with manure | Wheat |
| bacterial 16S rRNA                | ns       | ns      | 0.55*** | ns                  | ns    |
| archaeal 16S rRNA                 | ns       | ns      | ns      | ns                  | ns    |
| <i>nirK</i>                       | ns       | ns      | ns      | ns                  | ns    |
| <i>nirS</i>                       | 0.29***  | 0.54*** | ns      | 0.56***             | ns    |
| <i>nosZI</i>                      | ns       | ns      | ns      | ns                  | ns    |
| <i>nosZII</i>                     | ns       | ns      | ns      | ns                  | ns    |
| bacterial <i>amoA</i>             | ns       | ns      | ns      | ns                  | ns    |
| archaeal <i>amoA</i>              | ns       | -0.38*  | ns      | ns                  | ns    |
| comammox <i>amoA</i>              | ns       | ns      | -0.50** | ns                  | ns    |
| <i>nrfA</i>                       | ns       | ns      | 0.44**  | ns                  | ns    |
| N <sub>2</sub> O-N                | ns       | ns      | ns      | ns                  | ns    |

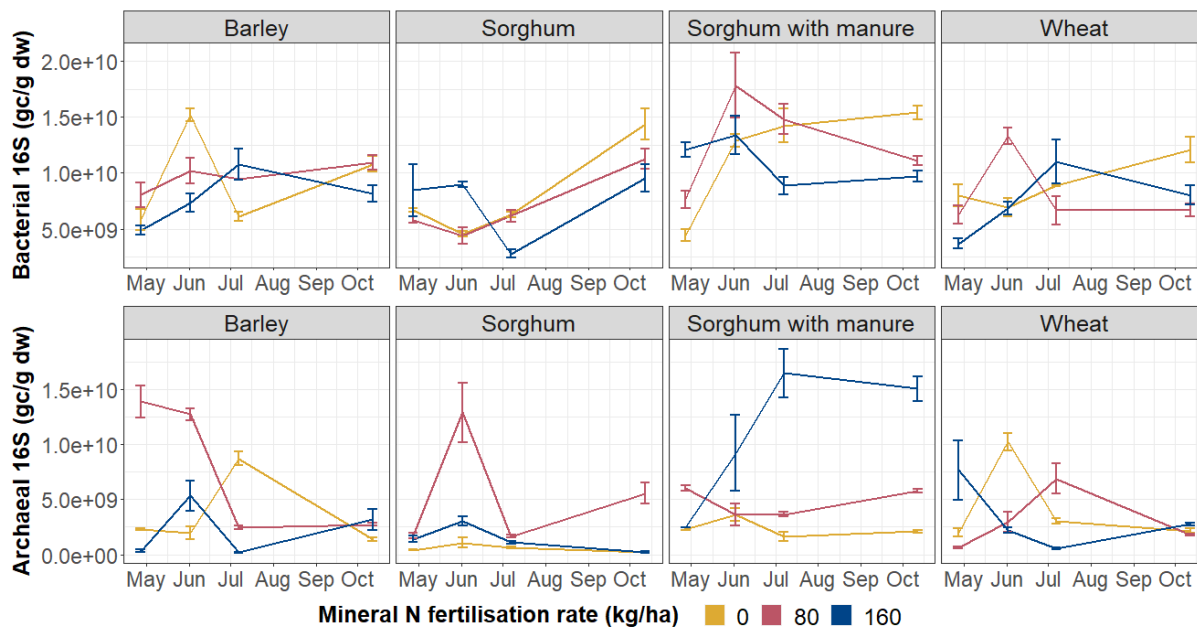

55 **Figure S1:** Abundances of bacterial and archaeal 16S rRNA genes according to crops and fertilisation rates during the study period.

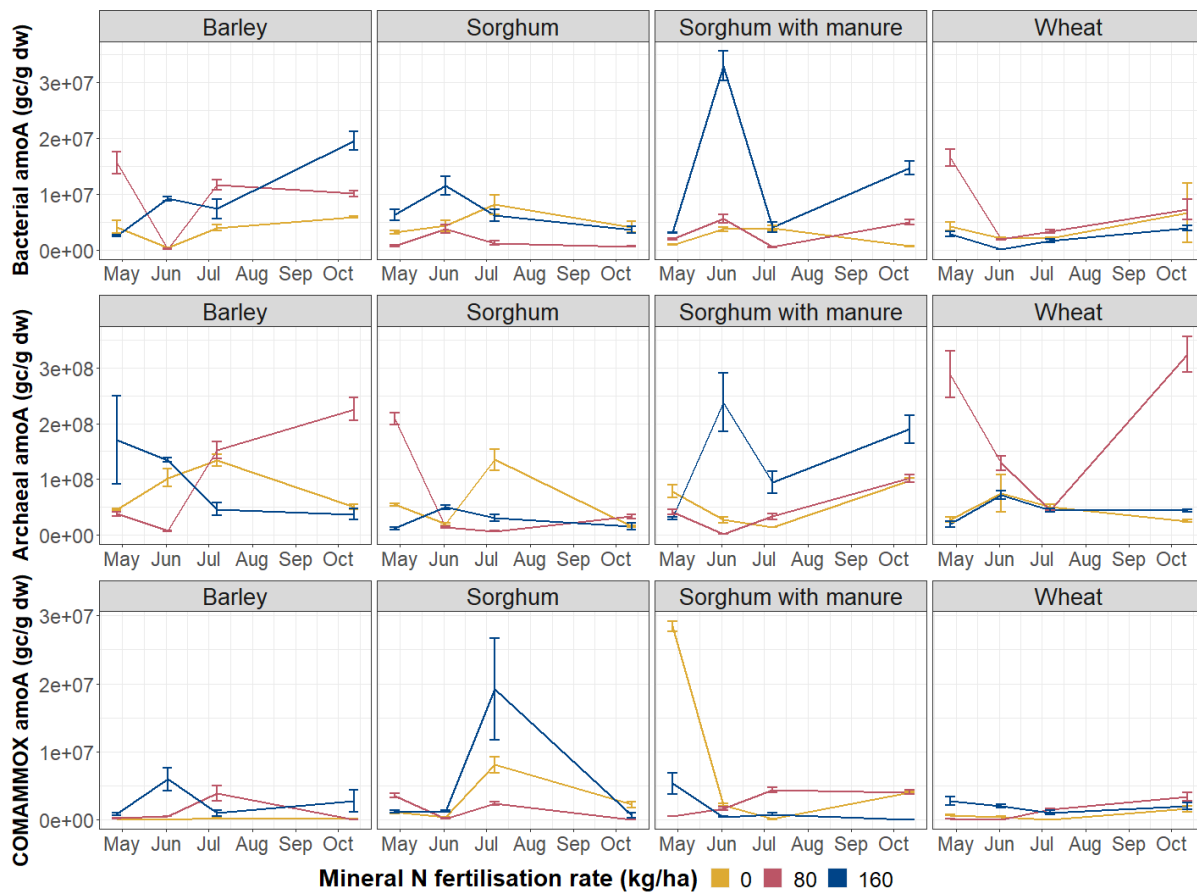

**Figure S2:** Abundances of bacterial, archaeal and comammox *amoA* genes according to crops and fertilisation rates during the study period.



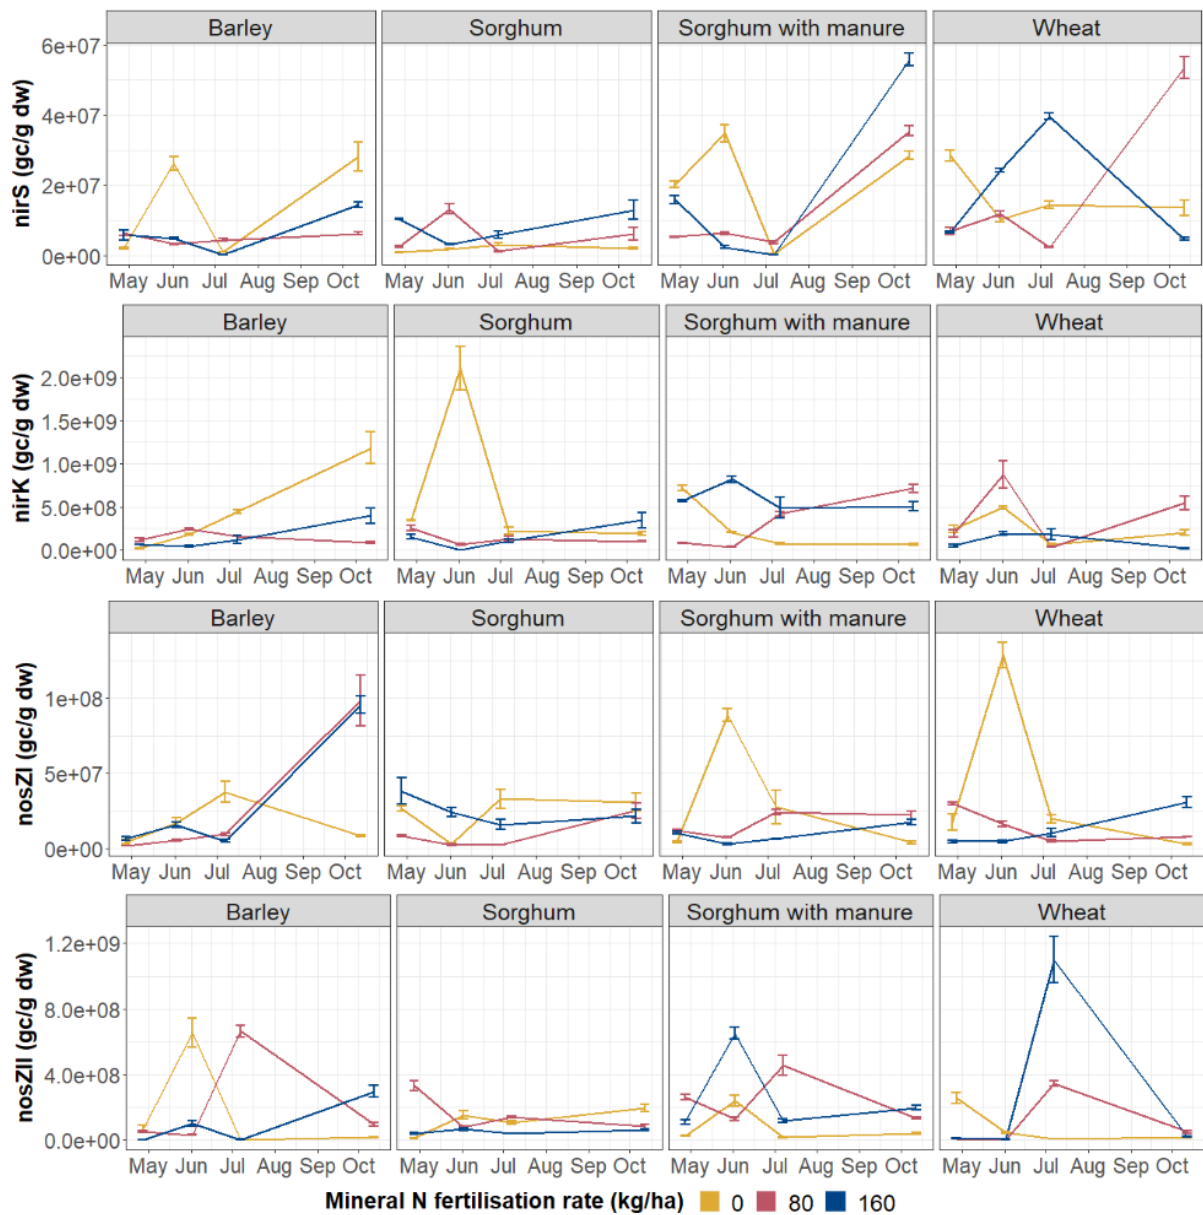

**Figure S3:** Abundances of *nirK*, *nirS*, *nosZI* and *nosZII* genes according to crops and fertilisation rates during the study period.

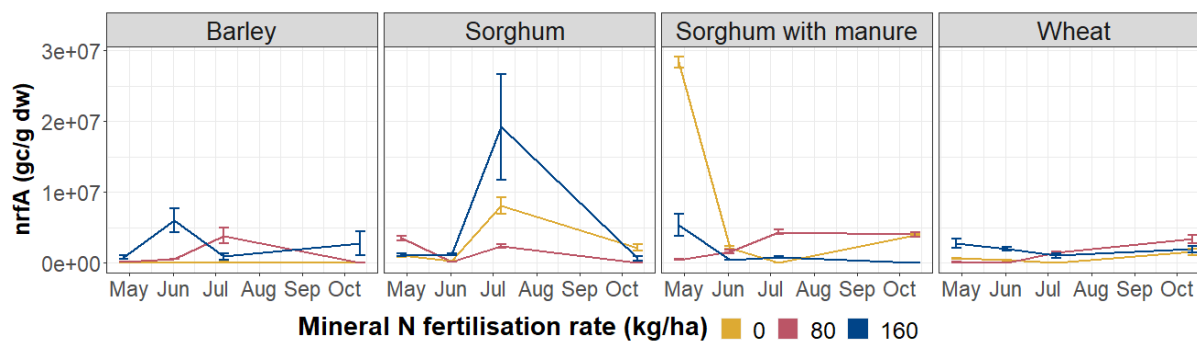

65 **Figure S4:** Abundance of *nrfA* gene according to crops and fertilisation rates during the study period.

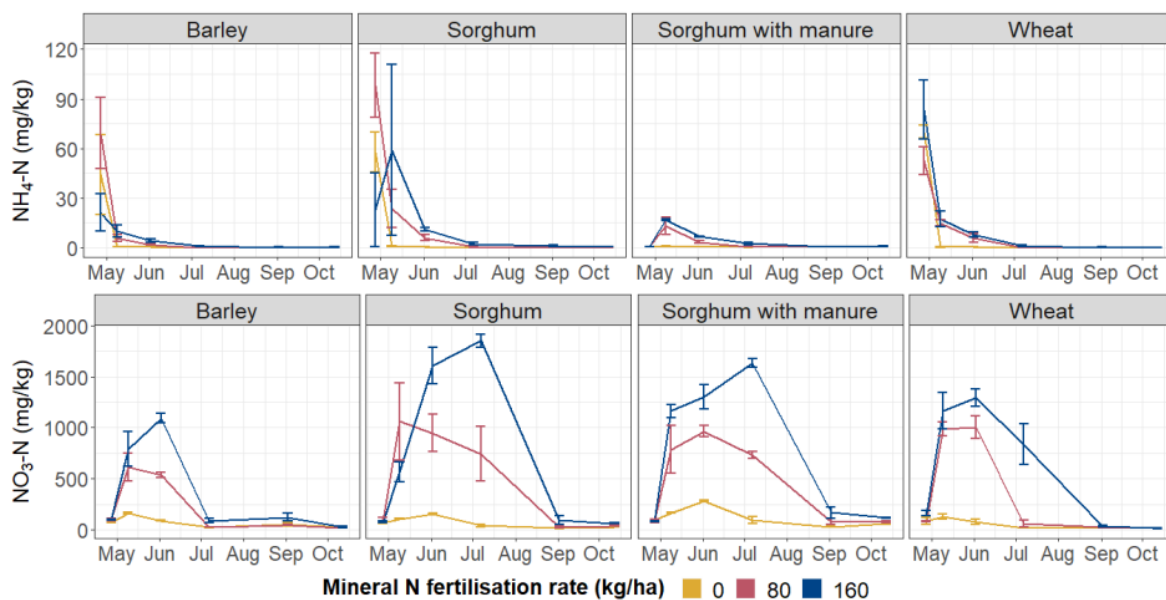

**Figure S5:**  $\text{NH}_4^+\text{-N}$  (mg/kg) and  $\text{NO}_3^-\text{-N}$  (mg/kg) contents of soil according to crops and fertilisation rates during the study period.

70

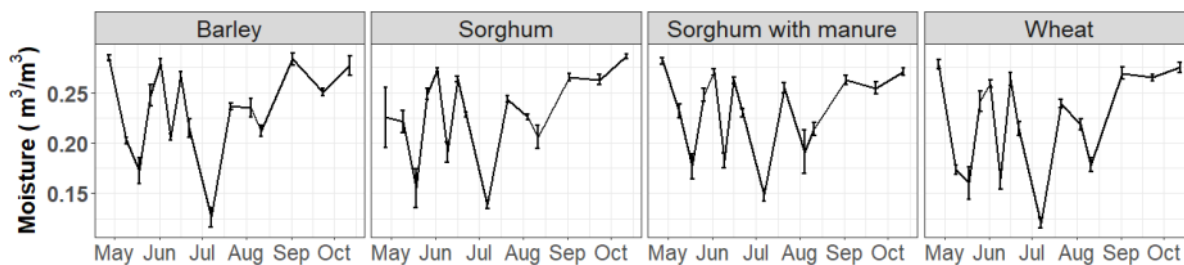

**Figure S6:** Soil moisture ( $\text{m}^3/\text{m}^3$ ) over the study period according to crop types and treatment.

75

### Supplementary Methodology

#### Methodology S1: Estimation of the di-nitrogen ( $\text{N}_2$ ) flux from the Daycent model

80 The  $\text{N}_2$  emissions were estimated from the measured  $\text{N}_2\text{O}$  emissions using the  $\text{N}_2:\text{N}_2\text{O}$  ratio, which was calculated as proposed in the DAYCENT model (Parton et al., 2001), with the following equation (Del Grosso et al., 2000):

$$R_{\text{N}_2/\text{N}_2\text{O}} = F_r(\text{NO}_3/\text{CO}_2) \times F_r(\text{WFPS}) \quad (\text{Eq. 1})$$

where the factor  $F_r(\text{NO}_3/\text{CO}_2)$  is a function of electron donor to substrate, calculated as:

$$F_r(\text{NO}_3/\text{CO}_2) = \max(0.16 k_1, k_1 e^{(-0.8 (C_{\text{NO}_3^-}/\text{Flux}_{\text{CO}_2}))}) \quad (\text{Eq. 2})$$

85 and  $F_r(\text{WFPS})$  is a factor accounting for the effect of soil water content on the  $\text{N}_2:\text{N}_2\text{O}$  ratio, with the water-filled pore space (WFPS):

$$F_r(\text{WFPS}) = 1.4/13^{2.2 \text{WFPS}} \quad (\text{Eq. 3})$$

90

95 Methodology S2: Nitrogen use efficiency

Nitrogen use efficiency (NUE, kg DM kg<sup>-1</sup> N<sup>-1</sup>) was calculated as the biomass yield produced per unit of N applied (Pandey *et al.*, 2001) as follows:

$$\text{NUE} = \frac{\text{Treatment biomass} - \text{Control biomass}}{\text{Total amount of nitrogen applied}} \quad (\text{Eq. 4})$$

- 100 Control biomass is the biomass yield of treatment with mineral fertilisation rate 0. For sorghum with manure amendment plots, control biomass is taken from sorghum without manure amendment plot with mineral N fertilisation rate 0.

Methodology S3: change of soil N content

- Change of soil N content was calculated as a difference between the initial soil total N content and final soil total N content  
105 (Sainju, 2017).

Total N content in soil was calculated (Sainju, 2017) as following:

$$\text{STN} = \text{STN}_c \times \text{BD} \times \text{T} \times 10\,000$$

STN = Total N content in soil (kg N ha<sup>-1</sup>), STN<sub>c</sub> = Total N concentration in soil (g N kg<sup>-1</sup>), BD = bulk density (Mg m<sup>-3</sup>), T=thickness of the soil layer (m), 10 000 = conversion factor.

110

Methodology S4: N losses

N losses are calculated by subtracting N outputs and change of soil N content from N inputs (Sainju *et al.*, 2017; Escuer-Gatius *et al.*, 2022). We consider N deposition, surface run-off and other fluxes neglectable.

- 115  $\text{N losses} = F_{\text{min.fertiliser}} + F_{\text{manure}} - \text{harvest} - \Delta\text{N}_{\text{soil}}$

$F_{\text{min.fertiliser}}$  = amount of N added as mineral fertiliser,  $F_{\text{slurry}}$  = amount of N added as manure,  $\Delta\text{N}_{\text{soil}}$  = change of soil N content during the experiment.

## 120 References

- Cannon, J., Sanford, R. A., Connor, L., Yang, W. H., & Chee-Sanford, J.: Optimization of PCR primers to detect phylogenetically diverse *nrfA* genes associated with nitrite ammonification. *Journal of Microbiological Methods*, 160, 49–59. <https://doi.org/10.1016/j.mimet.2019.03.020>, 2019.
- Dethlefsen, L., Huse, S., Sogin, M. L., & Relman, D. A.: The Pervasive Effects of an Antibiotic on the Human Gut  
125 Microbiota, as Revealed by Deep 16S rRNA Sequencing. *PLOS Biology*, 6(11), e280. <https://doi.org/10.1371/journal.pbio.0060280>, 2008.
- Escuer-Gatius, J., Löhmus, K., Shanskiy, M., Kauer, K., Vahter, H., Mander, Ü., Astover, A., Soosaar, K. Critical points for closing the carbon and nitrogen budgets in a winter rapeseed field. *Nutrient Cycling in Agroecosystems*, 122, 289–311. <https://doi.org/10.1007/s10705-022-10202-8>, 2022.
- 130 Espenberg, M., Truu, M., Truu, J., Maddison, M., Nõlvak, H., Järveoja, J., & Mander, Ü.: Impact of Reed Canary Grass Cultivation and Mineral Fertilisation on the Microbial Abundance and Genetic Potential for Methane Production in Residual Peat of an Abandoned Peat Extraction Area. *PLoS One*, 11(9), e0163864. <https://doi.org/10.1371/journal.pone.0163864>, 2016.
- Hallin, S., & Lindgren, P. E.: PCR detection of genes encoding nitrite reductase in denitrifying bacteria. *Applied and  
135 Environmental Microbiology*, 65(4), 1652–1657. <https://doi.org/10.1128/AEM.65.4.1652-1657.1999>, 1999.
- Henry, S., Bru, D., Stres, B., Hallet, S., & Philippot, L.: Quantitative detection of the *nosZ* gene, encoding nitrous oxide reductase, and comparison of the abundances of 16S rRNA, *narG*, *nirK*, and *nosZ* genes in soils. *Applied and Environmental Microbiology*, 72(8), 5181–5189. <https://doi.org/10.1128/AEM.00231-06>, 2006.
- Jones, C. M., Graf, D. R., Bru, D., Philippot, L., & Hallin, S.: The unaccounted yet abundant nitrous oxide-reducing  
140 microbial community: A potential nitrous oxide sink. *The ISME Journal*, 7(2), 2. <https://doi.org/10.1038/ismej.2012.125>, 2013.
- Kandeler, E., Deiglmayr, K., Tschierko, D., Bru, D., & Philippot, L.: Abundance of *narG*, *nirS*, *nirK*, and *nosZ* Genes of Denitrifying Bacteria during Primary Successions of a Glacier Foreland. *Applied and Environmental Microbiology*, 72(9), 5957–5962. <https://doi.org/10.1128/AEM.00439-06>, 2006.
- 145 Liu, Z., Lozupone, C., Hamady, M., Bushman, F. D., & Knight, R.: Short pyrosequencing reads suffice for accurate microbial community analysis. *Nucleic Acids Research*, 35(18), e120. <https://doi.org/10.1093/nar/gkm541>, 2007.
- Pandey, R. K., Maranville, J. W., & Bako, Y.: Nitrogen Fertilizer Response and Use Efficiency for Three Cereal Crops in Niger. *Communications in Soil Science and Plant Analysis*, 32(9–10), 1465–1482. <https://doi.org/10.1081/CSS-100104206>, 2001.
- 150 Rotthauwe, J. H., Witzel, K. P., & Liesack, W.: The ammonia monooxygenase structural gene *amoA* as a functional marker: Molecular fine-scale analysis of natural ammonia-oxidizing populations. *Applied and Environmental Microbiology*, 63(12), 4704–4712. <https://doi.org/10.1128/aem.63.12.4704-4712.1997>, 1997.

- Sainju, U. M.: Determination of nitrogen balance in agroecosystems. *MethodsX*, 4, 199–208. <https://doi.org/10.1016/j.mex.2017.06.001>, 2017.
- 155 Tourna, M., Freitag, T. E., Nicol, G. W., & Prosser, J. I.: Growth, activity and temperature responses of ammonia-oxidizing archaea and bacteria in soil microcosms. *Environmental Microbiology*, 10(5), 1357–1364. <https://doi.org/10.1111/j.1462-2920.2007.01563.x>, 2008.
- Wang, M., Huang, G., Zhao, Z., Dang, C., Liu, W., & Zheng, M.: Newly designed primer pair revealed dominant and diverse comammox amoA gene in full-scale wastewater treatment plants. *Bioresource Technology*, 270, 580–587. <https://doi.org/10.1016/j.biortech.2018.09.089>, 2018.
- 160
